# Supplementary material for: Impact of type 2 diabetes mellitus on short- and long-term mortality after coronary artery bypass surgery
Source: PubMed Central journal article supplement (PMC6264047; doi:10.1186/s12933-018-0796-7), 2018-11-29
Supplement: 12933_2018_796_MOESM2_ESM.pdf [file 12933_2018_796_MOESM2_ESM.pdf]

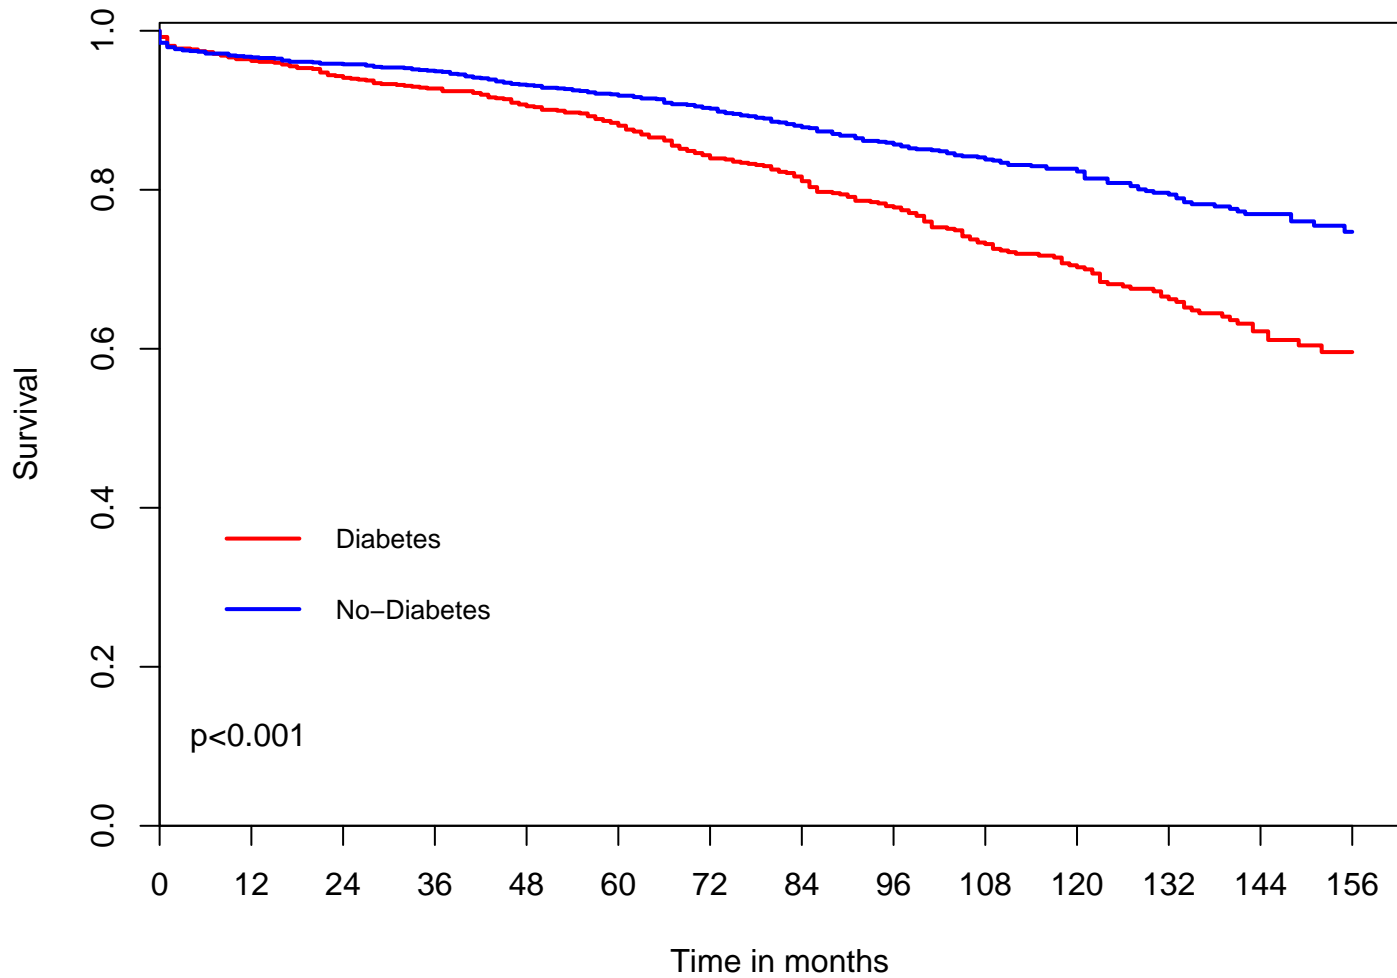

| # at risk   | 0    | 12   | 24   | 36   | 48   | 60   | 72  | 84  | 96  | 108 | 120 | 132 | 144 | 156 |
|-------------|------|------|------|------|------|------|-----|-----|-----|-----|-----|-----|-----|-----|
| Diabetes    | 895  | 863  | 844  | 830  | 811  | 730  | 624 | 553 | 457 | 374 | 279 | 199 | 124 | 48  |
| No-Diabetes | 1255 | 1214 | 1203 | 1192 | 1170 | 1073 | 963 | 868 | 742 | 630 | 477 | 348 | 213 | 84  |
