# Supplementary material for: Impact of type 2 diabetes mellitus on short- and long-term mortality after coronary artery bypass surgery
Source: PubMed Central journal article supplement (PMC6264047; doi:10.1186/s12933-018-0796-7), 2018-11-29
Supplement: 12933_2018_796_MOESM3_ESM.pdf [file 12933_2018_796_MOESM3_ESM.pdf]

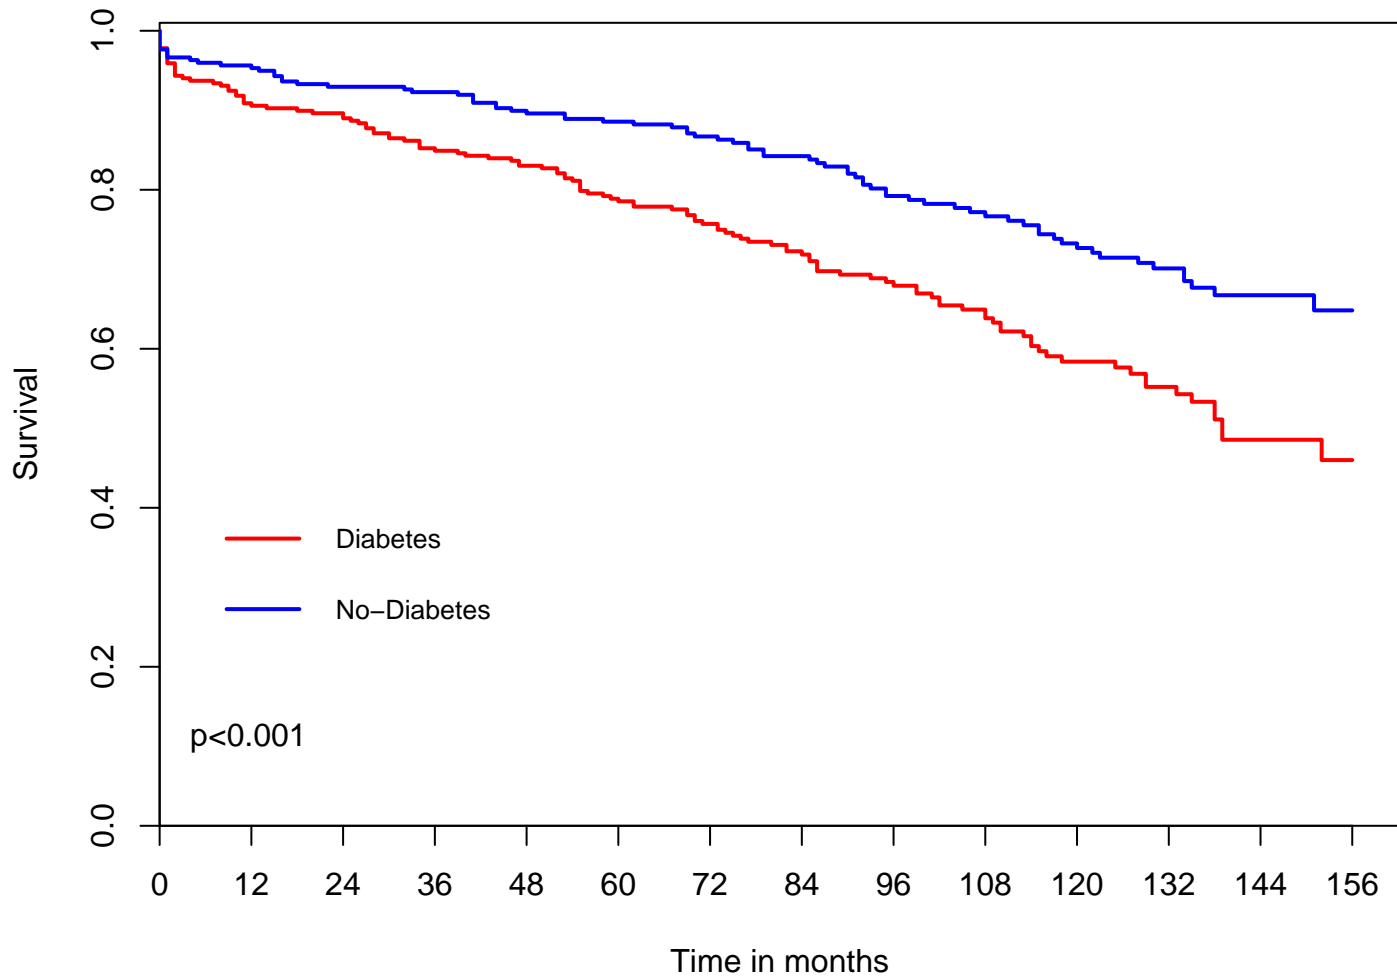

| # at risk   | 0   | 12  | 24  | 36  | 48  | 60  | 72  | 84  | 96  | 108 | 120 | 132 | 144 | 156 |
|-------------|-----|-----|-----|-----|-----|-----|-----|-----|-----|-----|-----|-----|-----|-----|
| Diabetes    | 318 | 289 | 285 | 271 | 264 | 239 | 205 | 175 | 145 | 119 | 86  | 63  | 33  | 12  |
| No-Diabetes | 298 | 285 | 277 | 275 | 268 | 253 | 218 | 194 | 164 | 146 | 126 | 96  | 54  | 27  |
