# Supplementary material for: Impact of type 2 diabetes mellitus on short- and long-term mortality after coronary artery bypass surgery
Source: PubMed Central journal article supplement (PMC6264047; doi:10.1186/s12933-018-0796-7), 2018-11-29
Supplement: 12933_2018_796_MOESM4_ESM.pdf [file 12933_2018_796_MOESM4_ESM.pdf]

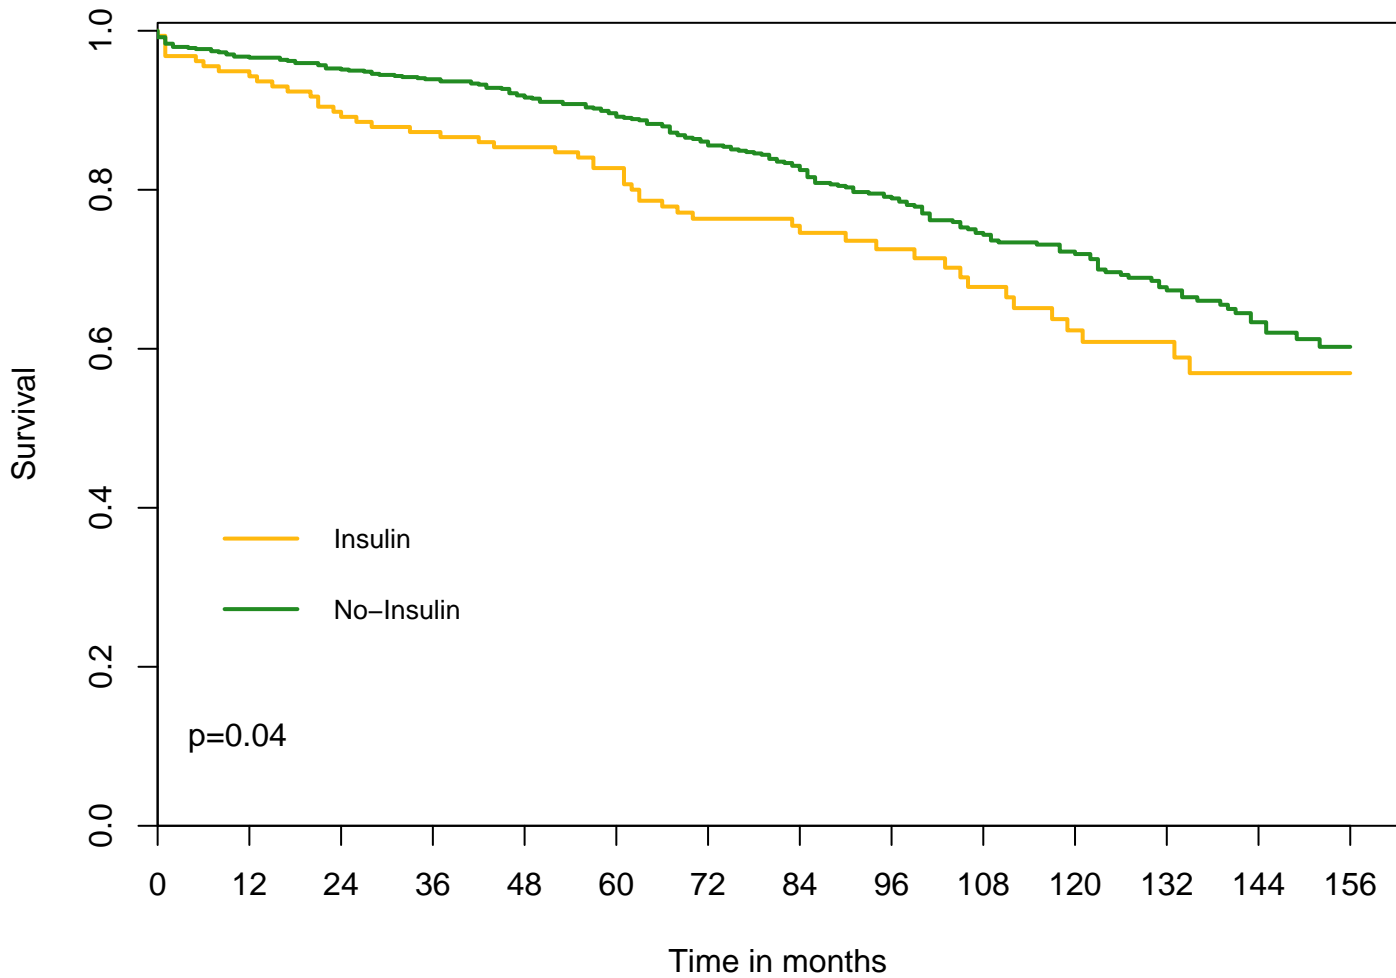

| # at risk  | 0   | 12  | 24  | 36  | 48  | 60  | 72  | 84  | 96  | 108 | 120 | 132 | 144 | 156 |
|------------|-----|-----|-----|-----|-----|-----|-----|-----|-----|-----|-----|-----|-----|-----|
| Insulin    | 157 | 149 | 141 | 137 | 134 | 122 | 97  | 85  | 66  | 55  | 44  | 32  | 18  | 7   |
| No-Insulin | 738 | 714 | 703 | 693 | 677 | 608 | 527 | 468 | 391 | 319 | 235 | 167 | 106 | 41  |
