# Supplementary material for: Impact of type 2 diabetes mellitus on short- and long-term mortality after coronary artery bypass surgery
Source: PubMed Central journal article supplement (PMC6264047; doi:10.1186/s12933-018-0796-7), 2018-11-29
Supplement: 12933_2018_796_MOESM5_ESM.pdf [file 12933_2018_796_MOESM5_ESM.pdf]

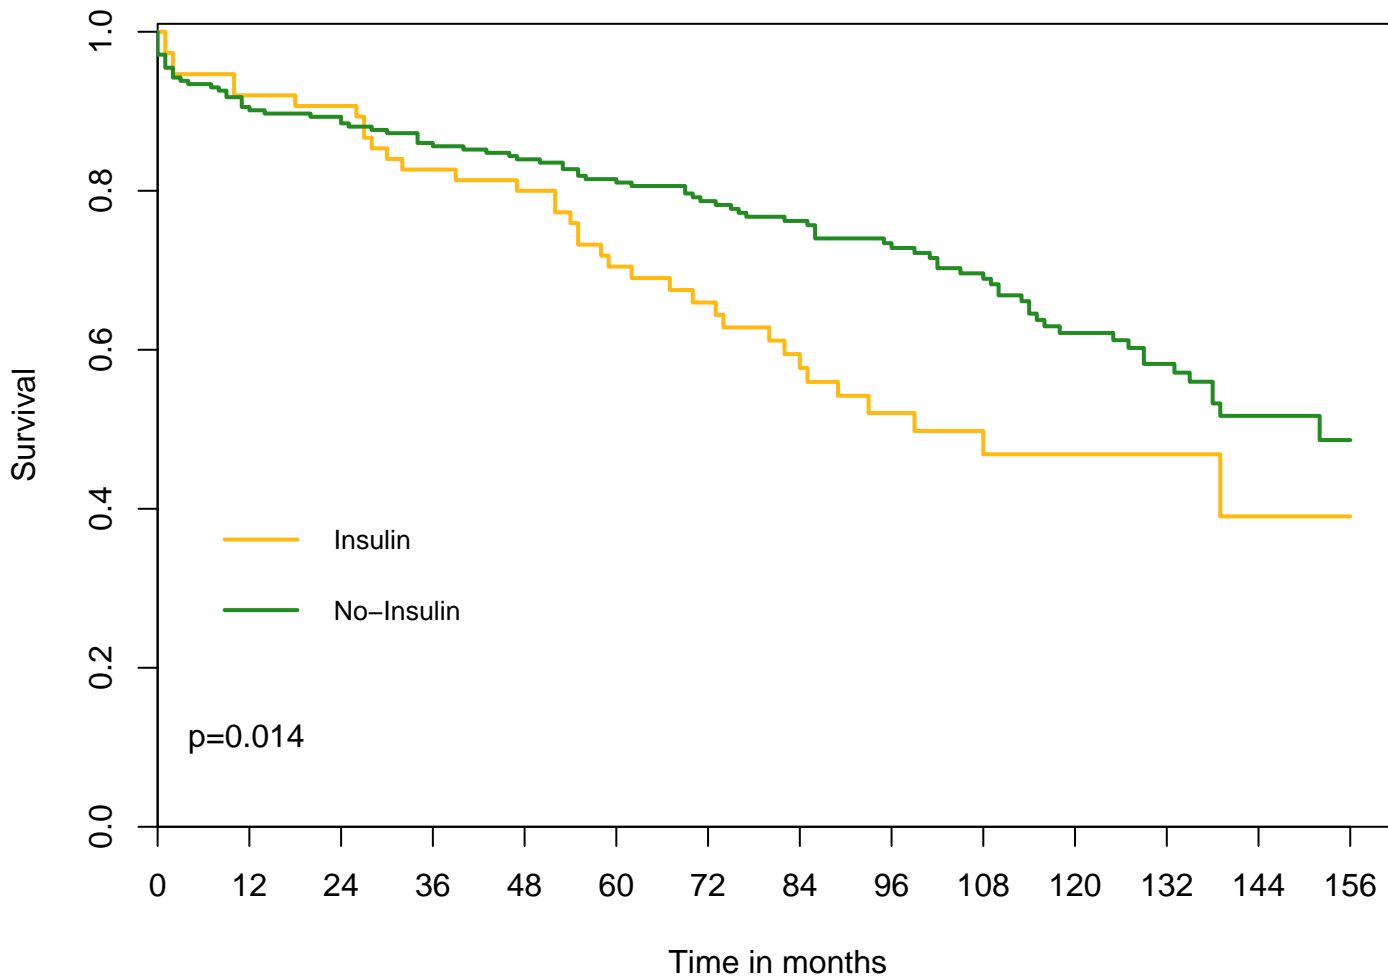

| # at risk  | 0   | 12  | 24  | 36  | 48  | 60  | 72  | 84  | 96  | 108 | 120 | 132 | 144 | 156 |
|------------|-----|-----|-----|-----|-----|-----|-----|-----|-----|-----|-----|-----|-----|-----|
| Insulin    | 75  | 69  | 68  | 62  | 60  | 51  | 42  | 34  | 24  | 17  | 13  | 8   | 5   | 2   |
| No-Insulin | 243 | 220 | 217 | 209 | 204 | 188 | 163 | 141 | 121 | 102 | 73  | 55  | 28  | 10  |
